# Supplementary material for: Estimates of the vitality and performances of Apis mellifera mellifera and hybrid honey bee colonies in Siberia: a 13-year study
Source: PeerJ. 2024 Jul 12;12:e17354. doi: 10.7717/peerj.17354 (PMC11249005; doi:10.7717/peerj.17354)
Supplement: Supplemental Information 1 [file peerj-12-17354-s001.xlsx]

## Sheet: Death of Bees-Colony Strength
Year				Death of bees, %	Colony Strength	Colony Strength		Temperature average
					in autumn	in spring		January
2010				18.148	2.51	1.9		-26.8
2011				17.4	2.62	2.13		-21.9
2012				16.203	2.64	2.15		-20.6
2013				14.688	2.56	2.29		-17.7
2014				14.79	2.73	2.23		-16.7
2015				14.906	2.81	2.32		-13.4
2016				13.463	3.18	2.65		-20.3
2017				13.429	3	2.68		-15.8
2018				13.219	3.13	2.63		-21.1
2019				11.719	2.81	2.75		-15.2
2020				12.063	2.53	2.39		-10.6
2021				12.469	2.56	2.29		-22.9
2022				12.234	2.34	2.31		-11.5
Year	2010	2011	2012	2013	2014	2015	2016	2017	2018	2019	2020	2021	2022
Cleanliness of the bee hive, points	3.833	4.055	4.281	4.359	4.435	4.438	4.648	4.619	4.625	4.844	4.906	4.969	4.813
Death of bees, %	18.15	17.4	16.203	14.688	14.79	14.906	13.463	13.429	13.219	11.719	12.063	12.469	12.234

## Sheet: Cleanliness-Death 
Year				Cleanliness of the beehive	Death of bees, %	Death of bees, %	Death of bees, %
Year				Cleanliness of the beehive	Death of bees, %
2010				3.833	18.148
2011				4.055	17.4
2012				4.281	16.203
2013				4.359	14.688
2014				4.435	14.79
2015				4.438	14.906
2016				4.648	13.463
2017				4.619	13.429
2018				4.625	13.219
2019				4.844	11.719
2020				4.906	12.063
2021				4.969	12.469
2022				4.813	12.234
