# Supplementary material for: Estimates of the vitality and performances of Apis mellifera mellifera and hybrid honey bee colonies in Siberia: a 13-year study
Source: PeerJ. 2024 Jul 12;12:e17354. doi: 10.7717/peerj.17354 (PMC11249005; doi:10.7717/peerj.17354)
Supplement: Supplemental Information 2 [file peerj-12-17354-s002.xlsx]

## Sheet: Honey yield (2010-2022)
Honey productivity
Year	2010	2011	2012	2013	2014	2015	2016	2017	2018	2019	2020	2021	2022
Honey yield	32.4	34.5	57.44	34.22	44.44	44.48	51.19	61.03	64.11	65.34	65.31	64.78	64.05
Control hive	87	48	175	67	45	60	83	66	62	74	66	65	70
Colony strenght in spring	1.9	2.13	2.15	2.29	2.23	2.32	2.65	2.68	2.63	2.75	2.39	2.29	2.31

## Sheet: honey yield-temperature
Year	Honey yield			Temperature average		Honey yield	Honey yield
				June-July		2016-2022	2010-2015
2010	32			16			32
2011	35			17			35
2012	57			21			57
2013	34			17			34
2014	44			18			44
2015	45			19			45
2016	51			19		51
2017	61			18		61
2018	64			18		64
2019	65			17		65
2020	65			17		65
2021	65			17		65
2022	64			17		64
