# Supplementary material for: Estimates of the vitality and performances of Apis mellifera mellifera and hybrid honey bee colonies in Siberia: a 13-year study
Source: PeerJ. 2024 Jul 12;12:e17354. doi: 10.7717/peerj.17354 (PMC11249005; doi:10.7717/peerj.17354)
Supplement: Supplemental Information 3 [file peerj-12-17354-s003.xlsx]

## Sheet: 2012
Year	Date	Temperature	Line	Queen egg laying
2012	18-29 april	1	Hybrid	746.67
2012	30 april-11 may	2	Hybrid	1103.33
2012	12-23 may	3	Hybrid	1376.67
2012	24 may-4 june	4	Hybrid	1660
2012	5-16 june	5	Hybrid	1846.67
2012	17-28 june	6	Hybrid	1876.67
2012	29 june-10 july	7	Hybrid	1990
2012	11-22 july	8	Hybrid	2080
2012	18-29 april	1	Native	682.5
2012	30 april-11 may	2	Native	1000
2012	12-23 may	3	Native	1462.5
2012	24 may-4 june	4	Native	1802.5
2012	5-16 june	5	Native	2167.5
2012	17-28 june	6	Native	2457.5
2012	29 june-10 july	7	Native	2638.75
2012	11-22 july	8	Native	2577.5

## Sheet: 2013
Year	Date	Temperature	Line	Queen egg laying
2013	18-29 april	1	Hybrid	606.67
2013	12-23 may	2	Hybrid	1380
2013	24 may-4 june	3	Hybrid	1520
2013	5-16 june	4	Hybrid	1666.67
2013	17-28 june	5	Hybrid	1695
2013	29 june-10 july	6	Hybrid	1783.33
2013	11-22 july	7	Hybrid	1871.67
2013	18-29 april	1	Native	638.75
2013	12-23 may	2	Native	1221.25
2013	24 may-4 june	3	Native	1737.5
2013	5-16 june	4	Native	2040
2013	17-28 june	5	Native	2245
2013	29 june-10 july	6	Native	2322.5
2013	11-22 july	7	Native	2500

## Sheet: 2014
Year	Date	Temperature	Line	Queen egg laying
2014	18-29 april	1	Native	788.75
2014	30 april-11 may	2	Native	1238.75
2014	12-23 may	3	Native	1460
2014	24 may-4 june	4	Native	1867.5
2014	5-16 june	5	Native	2247.5
2014	17-28 june	6	Native	2432.75
2014	29 june-10 july	7	Native	2615
2014	11-22 july	8	Native	2712.5
2014	18-29 april	1	Hybrid	730
2014	30 april-11 may	2	Hybrid	1000
2014	12-23 may	3	Hybrid	1153.33
2014	24 may-4 june	4	Hybrid	1380
2014	5-16 june	5	Hybrid	1626.67
2014	17-28 june	6	Hybrid	1700
2014	29 june-10 july	7	Hybrid	1826.67
2014	11-22 july	8	Hybrid	1963.33
