# Supplementary material for: Estimates of the vitality and performances of Apis mellifera mellifera and hybrid honey bee colonies in Siberia: a 13-year study
Source: PeerJ. 2024 Jul 12;12:e17354. doi: 10.7717/peerj.17354 (PMC11249005; doi:10.7717/peerj.17354)
Supplement: Supplemental Information 4 [file peerj-12-17354-s004.xlsx]

## Sheet: 2012
Year	Date	Temperature	Line	Development
2012	8-14 april	1	A. m. mellifera	3
2012	15-21 april	2	A. m. mellifera	3.063
2012	22-30 april	3	A. m. mellifera	3.175
2012	1-7 may	4	A. m. mellifera	3.58
2012	8-14 may	5	A. m. mellifera	4.038
2012	15-21 may	6	A. m. mellifera	4.48
2012	22-31 may	7	A. m. mellifera	5.013
2012	1-7 june	8	A. m. mellifera	5.55
2012	8-14 june	9	A. m. mellifera	6.14
2012	8-14 april	1	Hybrids	2.8
2012	15-21 april	2	Hybrids	2.97
2012	22-30 april	3	Hybrids	3.267
2012	1-7 may	4	Hybrids	3.7
2012	8-14 may	5	Hybrids	4.133
2012	15-21 may	6	Hybrids	4.333
2012	22-31 may	7	Hybrids	4.233
2012	1-7 june	8	Hybrids	4.4
2012	8-14 june	9	Hybrids	4.767

## Sheet: 2013
Year	Date	Temperature	Line	Development
2013	8-14 april	1	Hybrids	2.633
2013	15-21 april	2	Hybrids	2.7
2013	22-30 april	3	Hybrids	3.033
2013	1-7 may	4	Hybrids	3.4
2013	8-14 may	5	Hybrids	3.5
2013	15-21 may	6	Hybrids	3.8
2013	22-31 may	7	Hybrids	3.867
2013	1-7 june	8	Hybrids	4.267
2013	8-14 june	9	Hybrids	4.6
2013	15-21 june	10	Hybrids	4.633
2013	8-14 april	1	A. m. mellifera	2.8
2013	15-21 april	2	A. m. mellifera	2.86
2013	22-30 april	3	A. m. mellifera	3.15
2013	1-7 may	4	A. m. mellifera	3.35
2013	8-14 may	5	A. m. mellifera	3.4
2013	15-21 may	6	A. m. mellifera	3.74
2013	22-31 may	7	A. m. mellifera	4.06
2013	1-7 june	8	A. m. mellifera	4.74
2013	8-14 june	9	A. m. mellifera	5.09
2013	15-21 june	10	A. m. mellifera	5.86

## Sheet: 2014
Year	Date	Temperature	Line	Development
2014	1-7 april	1	Hybrids	1.9
2014	8-14 april	2	Hybrids	2.033
2014	15-21 april	3	Hybrids	2.2
2014	22-30 april	4	Hybrids	2.483
2014	1-7 may	5	Hybrids	3.033
2014	8-14 may	6	Hybrids	3.4
2014	15-21 may	7	Hybrids	3.833
2014	22-31 may	8	Hybrids	4.167
2014	1-7 june	9	Hybrids	4.45
2014	8-14 june	10	Hybrids	4.817
2014	15-21 june	11	Hybrids	4.983
2014	22-30 june	12	Hybrids	5.167
2014	1-7 july	13	Hybrids	5.533
2014	8-14 july	14	Hybrids	5.883
2014	15-21 july	15	Hybrids	6.2
2014	1-7 april	1	A. m. mellifera	2.88
2014	8-14 april	2	A. m. mellifera	2.88
2014	15-21 april	3	A. m. mellifera	3.025
2014	22-30 april	4	A. m. mellifera	3.25
2014	1-7 may	5	A. m. mellifera	3.58
2014	8-14 may	6	A. m. mellifera	3.925
2014	15-21 may	7	A. m. mellifera	4.238
2014	22-31 may	8	A. m. mellifera	4.575
2014	1-7 june	9	A. m. mellifera	4.863
2014	8-14 june	10	A. m. mellifera	5.213
2014	15-21 june	11	A. m. mellifera	5.475
2014	22-30 june	12	A. m. mellifera	5.75
2014	1-7 july	13	A. m. mellifera	6.175
2014	8-14 july	14	A. m. mellifera	6.5
2014	15-21 july	15	A. m. mellifera	6.7
